# Supplementary material
Source: PubMed Central journal article supplement (PMC2868439)
Supplement: supp_51_3_1540__1.pdf [file supp_51_3_1540__1.pdf]

**SUPPLEMENTARY FIGURE S1:**

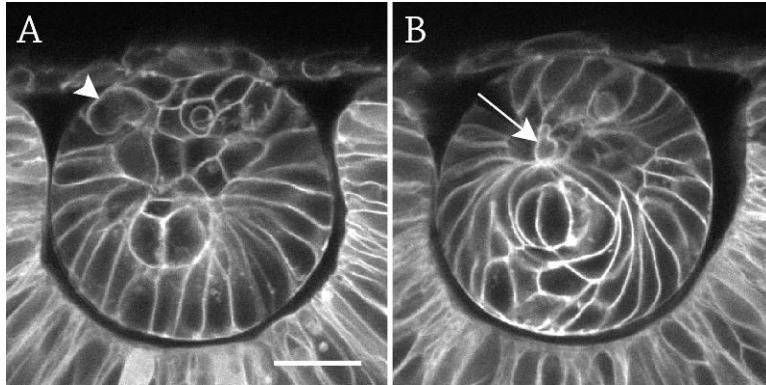

**Supplementary Figure S1:** Cell birth and death in a living, developing embryo. (A) 23 hpf, a mitotic cell in the anterior lens mass undergoing cell division (arrowhead). (B) 24 hpf, a cell in the anterior lens mass with blebbing, presumably undergoing apoptosis (arrow). White bar = 20 micrometers.
